# Supplementary material for: Establish a teleost skin explant model for studying the fish-pathogen interaction
Source: Research Square preprint supplement (doi:10.21203/rs.3.rs-204750/v1), 2021-02-17
Supplement: Supplementary file 1 [file 635d2c13dd38e05b82d1829c.docx]

| Target gene | Primer | Primer sequence (5’→3’) | Product length (bp) | Accession no. |
| --- | --- | --- | --- | --- |
| EF-1α | Forward  Reverse | AGGACATCCGTCGTGGTAAC  TCAGGATGATGACCTGAGCA | 90 | XM_026930196.2 |
| ZO-1 | Forward  Reverse | AAAATCCTCCGACTCCTCGT  CAGTTCGCTCCAACCAAGTAG | 90 | XM_034299525.1 |
| Claudin-1 | Forward  Reverse | GATGACGTGGAGCTCAAAAAC  AGCAACGAAAGCACAGACAC | 81 | XM_034303602.1 |
| Occludin-1 | Forward  Reverse | GTTGAAAAGCCGAACGAGAG  ATCGGAGGGAACTCACTGTC | 90 | XM_034299259.1 |
| MUC5AC | Forward  Reverse | GTGTTTCAATACTACGACACGG  AAAGGGCAACACGTTCACTC | 158 | XM_034297821.1 |
| TLR4 | Forward  Reverse | GCAAGGCAATGCTAACATCAT  GAAGACCAAACACCTTCTTTGAC | 74 | XM_026932800.2 |
| TLR5 | Forward  Reverse | TCATCTCGGTTCTGTTGATCC  AAGCGGTTTCCAGACAACTC | 69 | XM_034310181.1 |
| NF-κB | Forward  Reverse | TGGGCTATTCCTTCACTTCAC  TGACATACCCACTCCGTTACTG | 72 | XM_026937724.2 |
| IL-1β | Forward  Reverse | CAGTGCAAATGTGTCAGCAG  GGTCTCATCATGAAGCGTGA | 62 | XM_034312378.1 |
| TNFα | Forward  Reverse | GCAGACCAGTCTTTCGCTTC  GGCCATTACGGAGAATCTTG | 67 | XM_026942329.2 |
